# Supplementary material for: Core–shell structured CeO2@MoS2nanocomposites for high performance symmetric supercapacitors
Source: Royal Society of Chemistry journal article supplement (doi:10.1039/c5ce02466h), 2016-01-01
Supplement: c5ce02466h1.pdf [file c5ce02466h1.pdf]

## ***Electronic Supplementary Information***

### **Core-Shell Structured CeO<sub>2</sub>@MoS<sub>2</sub> Nanocomposites for High Performance Symmetric Supercapacitor**

Na Li, Hongyang Zhao, Yi Zhang, Zhengqing Liu, Xueyun Gong and Yaping Du\*

**Chemicals.** Cerium (III) nitrate hexahydrate (Ce(NO<sub>3</sub>)<sub>3</sub>·6H<sub>2</sub>O, 99.99 %, Sigma-Aldrich), tetraethylorthosilicate (Si(OC<sub>2</sub>H<sub>5</sub>)<sub>4</sub>, 98 %, Acros Organics), sodium molybdate (Na<sub>2</sub>MoO<sub>4</sub>·2H<sub>2</sub>O, 99 %, Fluka), thioacetamide (CH<sub>3</sub>CSNH<sub>2</sub>, 98 %, Sigma-Aldrich), 1-ethyl-3-methylimidazolium tetrafluoroborate (Emim(BF<sub>4</sub>), C<sub>6</sub>H<sub>11</sub>BF<sub>4</sub>N<sub>2</sub>, 98%, Energy Chemical), sodium sulfate (Na<sub>2</sub>SO<sub>4</sub>, 99%, Energy Chemical). Ammonium hydroxide (NH<sub>3</sub>·H<sub>2</sub>O, 25 %), absolute ethanol (C<sub>2</sub>H<sub>6</sub>O, 99.7 %), sodium hydroxide (NaOH, 96 %) and ethylene glycol (C<sub>2</sub>H<sub>6</sub>O<sub>2</sub>) were purchased from Tianjin Zhiyuan Chemical Company. All chemicals were used without any further purification. Deionized water was used throughout this study.

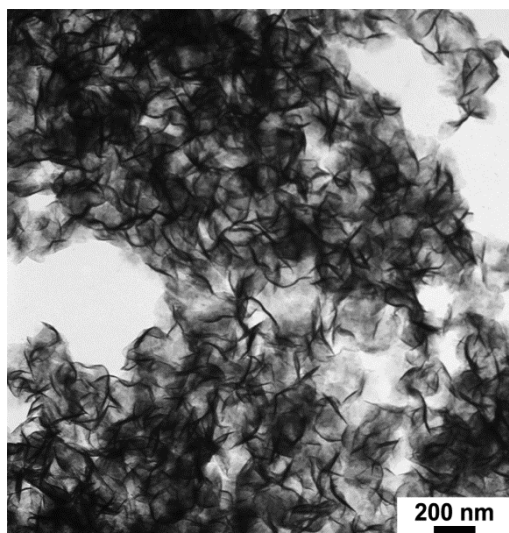

**Figure S1.** TEM image of pure MoS<sub>2</sub> nanosheets.

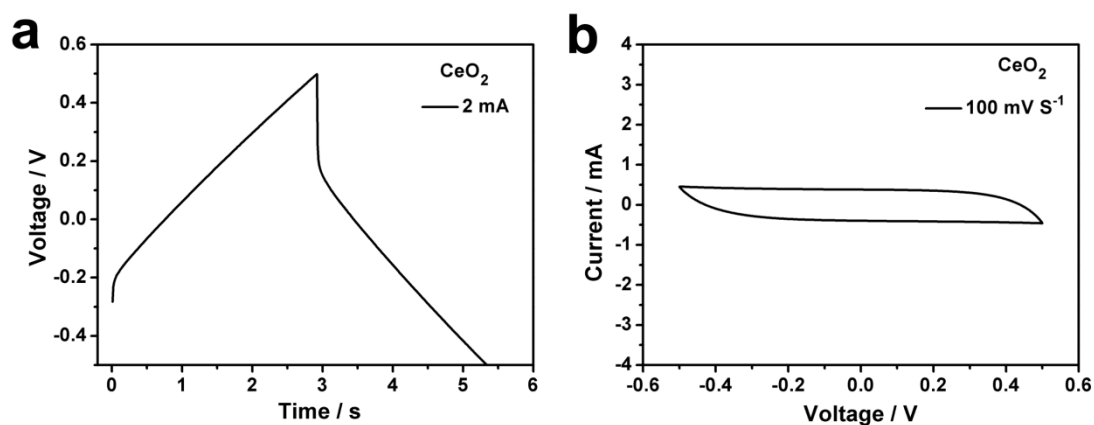

**Figure S2.** The electrochemical performance of CeO<sub>2</sub> porous hollow spheres in a two-electrode cell with aqueous electrolyte (1M Na<sub>2</sub>SO<sub>4</sub>). (a) The galvanostatic charge-discharge profiles of CeO<sub>2</sub> hollow spheres at the applied current of 2 mA (The active electrodes area was ca. 0.785 cm<sup>2</sup>). (b) Cyclic voltammetry plots of CeO<sub>2</sub> hollow spheres at the scan rate of 100 mV s<sup>-1</sup>.

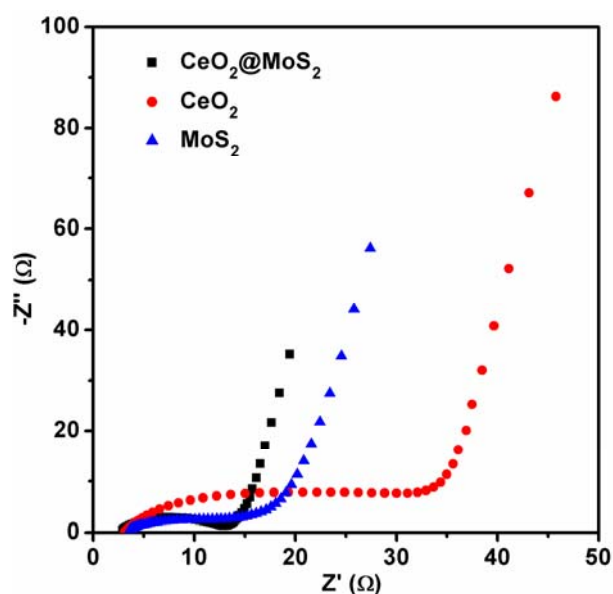

**Figure S3.** EIS Nyquist plots of  $\text{CeO}_2@MoS_2$  nanocomposites,  $\text{CeO}_2$  hollow spheres and  $MoS_2$  nanosheets with aqueous electrolyte (1M  $Na_2SO_4$ ). We used AUTOLAB electrochemistry workstation to test the impedance of  $\text{CeO}_2@MoS_2$  nanocomposites,  $\text{CeO}_2$  hollow spheres and  $MoS_2$  nanosheets. As shown in **Figure S3**, Nyquist plots revealed the charge-transfer resistance ( $R_{ct}$ ) for  $\text{CeO}_2@MoS_2$  nanocomposites was the smallest compared with pure  $MoS_2$  nanosheets and  $\text{CeO}_2$  hollow spheres, indicating a smaller reaction resistance and hence a better performance for supercapacitor with aqueous electrolyte (1M  $Na_2SO_4$ ) for  $\text{CeO}_2@MoS_2$  nanocomposites.
